# Supplementary material
Source: publisher figshare collection journal article supplement (https://gsajournals.figshare.com/ndownloader/files/22851398)
Supplement: Supplementary file 1 [file 22851398]

**Figure S3. Scree plot procuded with pcadapt. Here the eigenvalues corresponding to random variation lie on the straight line and the values corresponding to population structure depart from it.**
